# Supplementary material for: Ecological Predictors of Older Adults’ Participation and Retention in a Physical Activity Intervention
Source: MDPI journal article supplement (doi:10.3390/ijerph19063190), 2022-03-08
Supplement: s1 [file s1]

## Supplementary Materials

|                                | Community     | Intervention group | District level SES | Distance to intervention sites | NE (urban/ suburban) |
|--------------------------------|---------------|--------------------|--------------------|--------------------------------|----------------------|
| Community                      | 1.000         | -0.058             | <b>-0.510</b>      | <b>0.256</b>                   | <b>0.877</b>         |
| Intervention group             | -0.058        | 1.000              | 0.016              | -0.072                         | -0.019               |
| District level SES             | <b>-0.510</b> | 0.016              | 1.000              | <b>-0.232</b>                  | <b>-0.641</b>        |
| Distance to intervention sites | <b>0.256</b>  | -0.072             | -0.232             | 1.000                          | <b>0.193</b>         |
| NE (urban/ suburban)           | <b>0.877</b>  | -0.019             | <b>-0.641</b>      | <b>0.193</b>                   | 1.000                |

**Figure S1:** Heat Map of correlation coefficients (Spearman's rho). Interpretation: 0 = none, 0.1-0.2 = poor, 0.3-0.5 = fair, 0.6-0.7 = moderate, 0.8-0.9 very strong, 1 = perfect [1]. Bold type = Correlation is significant at the 0.01 level (2-tailed). NE = Neighborhood.

1. Chan, Y. Biostatistics 104: correlational analysis. *Singapore Med J* 2003, 44, 614-619.

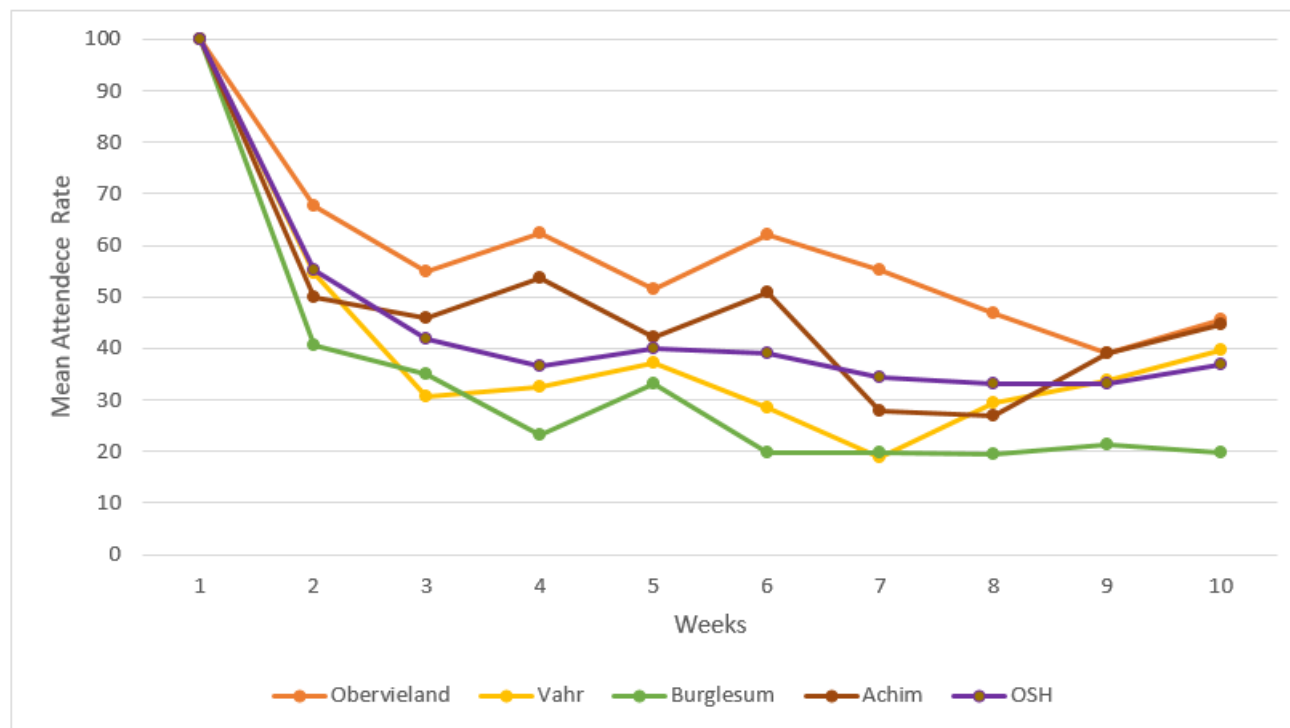

Figure S2: Descriptive of 10 weeks' class attendance rates.

**Table S1:** Number and type of weather expositions by different groups and communities. Note: \*The number of groups in each community varied according to the total number of participants in that community. The target group size was about 20 participants. \*\* Those who left the study before the first class were not included.

| Community   | Group* | Participants expected at the first class** | Date of the first class (week 2) | Date of the 10th class (week 11) | Season         | N of classes with rainfall exposures | N of classes with wind speed exposures | N of classes with temperature exposures |
|-------------|--------|--------------------------------------------|----------------------------------|----------------------------------|----------------|--------------------------------------|----------------------------------------|-----------------------------------------|
| Obervieland | 1      | 24                                         | 08-Mar-17                        | 10-May-17                        | Spring         |                                      |                                        |                                         |
|             | 2      | 19                                         | 22-Mar-17                        | 24-May-17                        | Spring         |                                      |                                        |                                         |
|             | 3      | 19                                         | 29-Mar-17                        | 31-May-17                        | Spring         |                                      |                                        |                                         |
|             | 4      | 23                                         | 05-Jul-17                        | 06-Sep-17                        | Summer/Autumn  |                                      | 2                                      |                                         |
|             | 5      | 21                                         | 12-Jul-17                        | 13-Sep-17                        | Summer/Autumn  |                                      | 3                                      |                                         |
|             | 6      | 21                                         | 26-Jul-17                        | 27-Sep-17                        | Summer/ Autumn |                                      | 2                                      |                                         |
| Vahr        | 1      | 11                                         | 23-Jun-16                        | 25-Aug-16                        | Summer         |                                      |                                        | 1                                       |
|             | 2      | 21                                         | 07-Jul-16                        | 08-Sep-16                        | Summer         |                                      |                                        | 1                                       |
|             | 3      | 24                                         | 14-Jul-16                        | 15-Sep-16                        | Summer         |                                      |                                        | 1                                       |
| Burglesum   | 1      | 15                                         | 20-May-16                        | 21-Jul-16                        | Spring/ Summer | 2                                    |                                        | 1                                       |
|             | 2      | 14                                         | 26-May-16                        | 28-Jul-16                        | Spring/ Summer | 2                                    |                                        | 1                                       |
|             | 3      | 23                                         | 09-Jun-16                        | 11-Aug-16                        | Summer         | 1                                    |                                        | 1                                       |
| Achim       | 1      | 23                                         | 03-Aug-17                        | 05-Oct-17                        | Summer/ Autumn |                                      | 3                                      |                                         |
|             | 2      | 18                                         | 17-Aug-17                        | 19-Oct-17                        | Summer/ Autumn |                                      | 2                                      |                                         |
|             | 3      | 23                                         | 24-Aug-17                        | 26-Oct-17                        | Summer/ Autumn |                                      | 2                                      |                                         |
| OSH         | 1      | 21                                         | 20-Jan-17                        | 24-Mar-17                        | Winter/ Spring |                                      | 1                                      |                                         |
|             | 2      | 19                                         | 27-Jan-17                        | 31-Mar-17                        | Winter/ Spring |                                      | 1                                      |                                         |
|             | 3      | 21                                         | 10-Feb-17                        | 13-Apr-17                        | Winter/ Spring |                                      | 1                                      |                                         |
|             | 4      | 19                                         | 17-Feb-17                        | 21-Apr-17                        | Winter/ Spring |                                      | 1                                      |                                         |
|             | 5      | 19                                         | 03-Mar-17                        | 05-May-17                        | Spring         |                                      | 1                                      |                                         |
| Sum         |        |                                            |                                  |                                  |                | 3                                    | 19                                     | 6                                       |

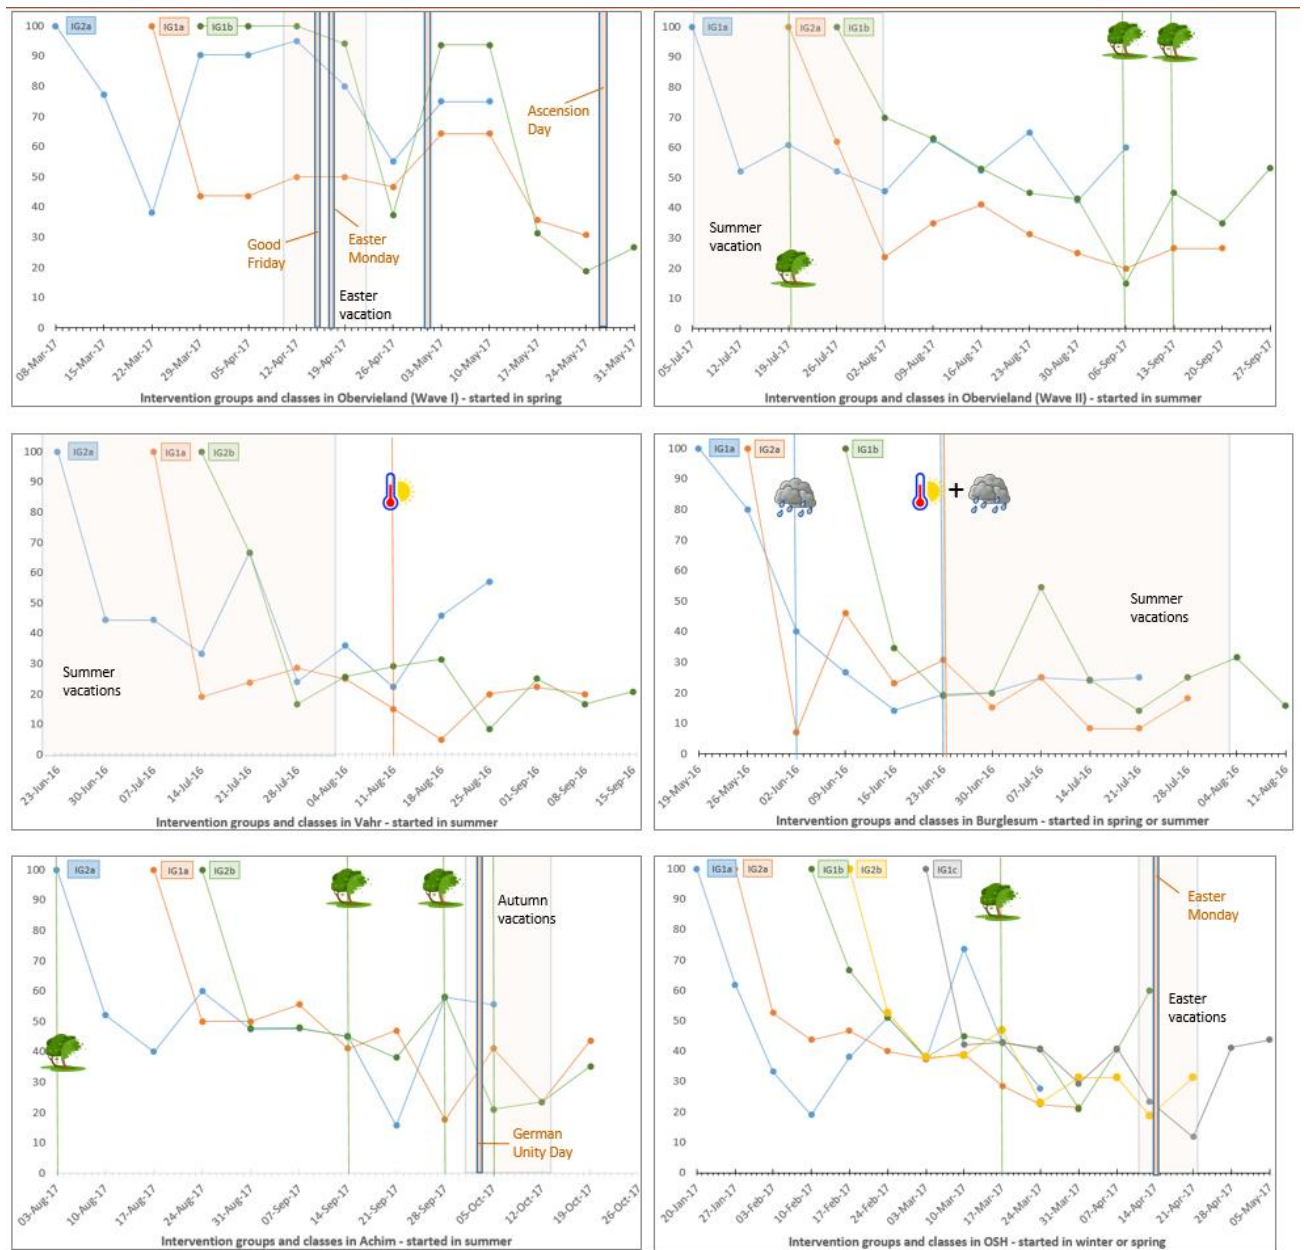

**Figure S3:** Weather expositions and holiday periods by days of class meeting and rate of expected attenders in different groups and communities. Note: ☁️ rainfall >15 l/m<sup>2</sup>, 🌡️ temperature >30, 🌳: wind speed >7, IG1a: web-based intervention with subjective PA self-monitoring, first group, IG1b: web-based intervention with subjective PA self-monitoring, second group, IG2a: web-based intervention with subjective and objective PA self-monitoring, first (only) group.
